# Supplementary material for: A Mathematical Model for Electrical Activity in Pig Atrial Tissue
Source: PubMed Central journal article supplement (PMC8960738; doi:10.3389/fphys.2022.812535), 2022-03-10
Supplement: Data_Sheet_1.pdf [file Data_Sheet_1.pdf]

## Supplementary Material

### 1 SUPPLEMENTARY APPENDIX

#### Differential Equations

Temporal evolution equation for transmembrane voltage in single cell:

$$\frac{dV}{dt} = -\frac{I_{ion} + I_{stim}}{C_m} \quad (S1)$$

Total ionic current  $I_{ion}$ :

$$\begin{aligned} I_{ion} = & I_{Na} + I_{K1} + I_{ClCa} + I_{Kur} + I_{Kr} + I_{Ks} \\ & + I_{Ca,L} + I_{p,Ca} + I_{NaK} \\ & + I_{NaCa} + I_{b,Na} + I_{b,Ca} \end{aligned} \quad (S2)$$

Spatiotemporal evolution equation for transmembrane voltage in tissue:

$$\frac{\partial V}{\partial t} = -\frac{I_{ion} + I_{stim}}{C_m} + D\nabla^2 V \quad (S3)$$

Temporal evolution equation for all time-dependent gating variables:

$$\frac{dn}{dt} = \frac{n_{\infty} - n}{\tau_n} \quad (S4)$$

Temporal evolution equations for the different ionic concentrations:

$$\frac{d[Na^+]_i}{dt} = \frac{-3I_{NaK} - 3I_{NaCa} - I_{b,Na} - I_{Na}}{Fv_i} \cdot C_m \quad (S5)$$

$$\frac{d[K^+]_i}{dt} = \frac{2I_{NaK} - I_{K1} - I_{Kur} - I_{Kr} - I_{Ks} - I_{b,K}}{Fv_i} \cdot C_m \quad (S6)$$

$$\frac{d[Cl^-]_i}{dt} = \frac{I_{ClCa}}{F \cdot v_i} \cdot C_m \quad (S7)$$

$$\frac{d[Ca^{2+}]_i}{dt} = \frac{B1}{B2} \quad (S8)$$

$$B1 = \frac{2I_{NaCa} - I_{p,Ca} - I_{Ca,L} - I_{b,Ca}}{2Fv_i} \cdot C_m + \frac{v_{up}(I_{up,leak} - I_{up}) + I_{rel}v_{rel}}{v_i} \quad (S9)$$

$$B2 = 1 + \frac{[Trpn]_{max} K_{m,Trpn}}{([Ca^{2+}]_i + K_{m,Trpn})^2} + \frac{[Cmndn]_{max} K_{m,Cmndn}}{([Ca^{2+}]_i + K_{m,Cmndn})^2} \quad (S10)$$

$$\frac{d[Ca^{2+}]_{up}}{dt} = I_{up} - I_{up,leak} - I_{tr} \frac{v_{rel}}{v_{up}} \quad (S11)$$

$$\frac{d[Ca^{2+}]_{rel}}{dt} = (I_{tr} - I_{rel}) \left\{ 1 + \frac{[Csqn]_{max} K_{m,Csqn}}{([Ca^{2+}]_{rel} + K_{m,Csqn})^2} \right\}^{-1} \quad (S12)$$

### Ionic Reversal Potential

$$E_X = (V_i - V_o) = \frac{RT}{zF} \ln\left(\frac{[X]_o}{[X]_i}\right), \quad X = Na^+, K^+, Ca^{2+}, Cl^- \quad (S13)$$

### Ionic Currents

#### Fast $Na^+$ Current

$$I_{Na} = g_{Na} m^3 h j (V - E_{Na}) \quad (S14)$$

$$\alpha_m = 0.32 \frac{V + 47.13}{1 - \exp[-0.1(V + 47.13)]}, \quad \text{if } V \neq 47.13 \quad (S15)$$

$$\alpha_m = 3.2, \quad \text{if } V = -47.13$$

$$\tau_m = \frac{1}{\alpha_m + \beta_m} \cdot 1.7 \quad (S16)$$

$$\beta_m = 0.08 \exp\left(-\frac{V}{11}\right) \quad (S17)$$

$$\alpha_h = 0.135 \exp\left(-\frac{V + 80}{6.8}\right), \quad \text{if } V < -40 \quad (S18)$$

$$\alpha_h = 0, \quad \text{if } V \geq -40$$

$$\beta_h = 3.56 \exp(0.079V) + 3.1 \cdot 10^5 \exp(0.35V), \quad \text{if } V < -40$$

$$\beta_h = \left( 0.13 \left[ 1 + \exp\left(-\frac{V + 10.66}{11.1}\right) \right] \right)^{-1}, \quad \text{if } V \geq -40 \quad (S19)$$

$$\tau_h = \frac{1}{\alpha_h + \beta_h} \cdot 2 \quad (S20)$$

$$\alpha_j = [-127140 \exp(0.2444V) - 3.474 \cdot 10^{-5} \exp(-0.04391V)] \cdot \frac{V + 37.78}{1 + \exp(0.311(V + 79.23))}, \quad \text{if } V < -40 \quad (\text{S21})$$

$$\alpha_j = 0, \quad \text{if } V \geq -40$$

$$\beta_j = 0.1212 \frac{\exp(-0.01052V)}{1 + \exp(-0.1378(V + 40.14))}, \quad \text{if } V < -40 \quad (\text{S22})$$

$$\beta_j = 0.3 \frac{\exp(-2.535 \cdot 10^{-7})}{1 + \exp(-0.1(V + 32))}, \quad \text{if } V \geq -40$$

$$\tau_j = \frac{1}{\alpha_j + \beta_j} \cdot 2 \quad (\text{S23})$$

$$m_\infty = \frac{1}{1 + \exp(-\frac{V+43}{7.7})} \quad (\text{S24})$$

$$h_\infty = \frac{1}{1 + \exp(\frac{V+66.5}{4.4})} \quad (\text{S25})$$

$$j_\infty = \frac{1}{1 + \exp(\frac{V+66.5}{4.1})} \quad (\text{S26})$$

Inward Rectifier,  $I_{K1}$

$$I_{K1} = g_{K1} \cdot \frac{V - E_K - 5}{1 + \exp(0.063 \cdot (V + 70))} \quad (\text{S27})$$

Transient Outward: Calcium-Driven Chloride Current,  $I_{to} = I_{to,2} \equiv I_{Cl,Ca}$

$$I_{ClCa} = g_{Cl,Ca} q_{Ca} (V - E_{Cl}) \quad (\text{S28})$$

$$q_{Ca,\infty} = 1 - \left[ \frac{1}{1 + \left( \frac{F_n}{1.1e-10} \right)^3} \right] \quad (\text{S29})$$

$$\tau_{Ca} = 2 \quad (\text{S30})$$

Ultrarapid Delayed Rectifier Current,  $I_{Kur}$

$$I_{Kur} = g_{Kur} \cdot u_a^3 \cdot (0.25u_{i,f} + 0.75u_{i,s}) \cdot (V - E_K) \quad (\text{S31})$$

$$g_{Kur} = g_{Kur,amp} \left[ 0.005 + \frac{0.05}{1 + \exp\left(-\frac{V-15}{13}\right)} \right] \quad (\text{S32})$$

$$\alpha_{u(a)} = 0.65 \left[ \exp\left(-\frac{V+10}{8.5}\right) + \exp\left(-\frac{V-30}{59.0}\right) \right]^{-1} \quad (\text{S33})$$

$$\beta_{u(a)} = 0.65 \left[ 2.5 + \exp\left(\frac{V+82}{17.0}\right) \right]^{-1} \quad (\text{S34})$$

$$\tau_{u(a)} = \frac{1}{K_{Q10}(\alpha_{u(a)} + \beta_{u(a)})} \quad (\text{S35})$$

$$u_{a(\infty)} = \frac{1}{1 + \exp\left(-\frac{V+30.3}{9.6}\right)} \quad (\text{S36})$$

$$\tau_{u_{if}} = 400 + 1068e^{-\left(\frac{V}{50}\right)^2} \quad (\text{S37})$$

$$\tau_{u_{is}} = 2000 + 60000e^{-\left(\frac{V+39.3}{30}\right)^2} \quad (\text{S38})$$

$$u_{i,f(\infty)} = u_{i,f(\infty)} = \frac{1}{1 + \exp\left(\frac{V+17.358}{5.849}\right)} \quad (\text{S39})$$

### Rapid Delayed Rectifier Current, $I_{Kr}$

$$I_{Kr} = g_{Kr} \cdot x_r \cdot \frac{V - E_K}{1 + \exp\left(\frac{V-79.4825}{8.2217}\right)} \quad (\text{S40})$$

$$\alpha_{x,r} = 0.0003 \frac{V + 14.1}{1 - \exp\left(-\frac{V+14.1}{5}\right)} \quad (\text{S41})$$

$$\beta_{x,r} = 7.3898 \cdot 10^{-5} \frac{V - 3.3328}{\exp\left(\frac{V-3.3328}{5.1237}\right) - 1} \quad (\text{S42})$$

$$\tau_{x,s} = \frac{1}{\alpha_{x(r)} + \beta_{x(r)}} \quad (\text{S43})$$

$$x_{r,\infty} = \frac{1}{1 + \exp\left(-\frac{V-4.445095}{9.33047}\right)} \quad (\text{S44})$$

### Slow Delayed Rectifier, $I_{Ks}$

$$I_{Ks} = g_{Ks} \cdot x_s^2 \cdot (V - E_K) \quad (\text{S45})$$

$$\alpha_{x,s} = 4 \cdot 10^{-5} \frac{V - 18.80816}{1 - \exp\left(-\frac{V-18.80816}{17}\right)} \quad (\text{S46})$$

$$\beta_{x,s} = 3.5 \cdot 10^{-5} \frac{V - 18.80816}{\exp\left(\frac{V-18.80816}{9}\right) - 1} \quad (\text{S47})$$

$$\tau_{x,s} = \frac{1}{\alpha_{x(s)} + \beta_{x(s)}} \cdot 0.5 \quad (\text{S48})$$

$$x_{s,\infty} = \left[ \frac{1}{1 + \exp\left(-\frac{V-18.80816}{12.6475}\right)} \right]^{1/2} \quad (\text{S49})$$

### L-Type $Ca^{2+}$ Current, $I_{Ca,L}$

$$I_{Ca,L} = g_{Ca,L} d f_{Ca} (V - 65.0) \quad (\text{S50})$$

$$\tau_d = \frac{1 - \exp\left(-\frac{V+5}{6.24}\right)}{0.035(V + 5) \left[ 1 + \exp\left(-\frac{V+5}{6.24}\right) \right]} \quad (\text{S51})$$

$$d_{\infty} = \frac{1}{1 + \exp\left(-\frac{V+5}{8}\right)} \quad (\text{S52})$$

$$\tau_f = 9 \cdot [0.0197 \exp(-0.0337^2(V + 5)^2) + 0.02]^{-1} \quad (\text{S53})$$

$$f_{\infty} = \frac{1}{1 + \exp\left(\frac{V+28}{6.9}\right)} \quad (\text{S54})$$

$$\tau_{f(Ca)} = 2, \quad f_{Ca,\infty} = \frac{1}{1 + \frac{[Ca^{2+}]_i}{0.00035}} \quad (\text{S55})$$

### NaK Pump Current

$$I_{NaK} = I_{NaK,max} f_{NaK} \frac{1}{1 + \{K_{m,Na(i)}/[Na^+]_i\}^{1.5}} \cdot \frac{[K^+]_o}{[K^+]_o + K_{m,K(o)}} \quad (\text{S56})$$

$$f_{NaK} = \left[ 1 + 0.1245 \exp\left(-0.1 \frac{FV}{RT}\right) + 0.0365 \sigma \exp\left(-\frac{FV}{RT}\right) \right]^{-1} \quad (\text{S57})$$

$$\sigma = \frac{1}{7} \left[ \exp\left(\frac{[Na^+]_o}{67.3}\right) - 1 \right] \quad (\text{S58})$$

$Na^+/Ca^{2+}$  Exchanger

$$I_{NaCa} = I_{NaCa,max} \cdot \frac{B1}{B2} \quad (S59)$$

$$B1 = \exp[\gamma VF/(RT)][Na^+]_i^3 [Ca^{2+}]_o - \exp[(\gamma - 1)VF/(RT)][Na^+]_o^3 [Ca^{2+}]_i \quad (S60)$$

$$B2 = (K_{m,Na}^3 + [Na^+]_o^3)(K_{m,Ca} + [Ca^{2+}]_o) \cdot \{1 + k_{sat} \exp[(\gamma - 1)VF/(RT)]\} \quad (S61)$$

Background Currents

$$I_{b,X} = g_{b,X}(V - E_X), \quad X = Na^+, Ca^{2+} \quad (S62)$$

$Ca^{2+}$  Pump Current

$$I_{p,Ca} = I_{p,Ca(max)} \frac{[Ca^{2+}]_i}{0.0005 + [Ca^{2+}]_i} \quad (S63)$$

$Ca^{2+}$  Release Current from the JSR,  $I_{rel}$

$$I_{rel} = k_{rel} \cdot u^2 v w \cdot ([Ca^{2+}]_{rel} - [Ca^{2+}]_i) \quad (S64)$$

$$\tau_u = 8, \quad u_\infty = \frac{1}{1 + \exp\left(\frac{F_n - 1.367 \cdot 10^{-13}}{13.67 \cdot 10^{-16}}\right)} \quad (S65)$$

$$\tau_v = 1.91 + 2.09 \left(1 + \exp\left[-\frac{F_n - 1.367 \cdot 10^{-13}}{13.67 \cdot 10^{-16}}\right]\right)^{-1} \quad (S66)$$

$$v_\infty = 1 - \frac{1}{1 + \exp\left(-\frac{F_n - 6.835 \cdot 10^{-14}}{13.67 \cdot 10^{-16}}\right)} \quad (S67)$$

$$\tau_w = 6.0 \cdot \frac{1 - \exp\left(-\frac{V-7.9}{5}\right)}{\left[1 + 0.3 \exp\left(-\frac{V-7.9}{5}\right)\right] (V - 7.9)} \quad (S68)$$

$$w_\infty = \frac{1}{1 + \exp\left(\frac{V-70}{8}\right)} \quad (S69)$$

$$F_n = 10^{-12} v_{rel} I_{rel} - \frac{5 \cdot 10^{-13}}{F} \left(\frac{1}{2} I_{Ca,L} - \frac{1}{5} I_{NaCa}\right) \cdot Cm \quad (S70)$$

## Transfer Current from NSR to JSR

$$I_{tr} = \frac{[Ca^{2+}]_{up} - [Ca^{2+}]_{rel}}{\tau_{tr}} \quad (S71)$$

$$\tau_{tr} = 180 \quad (S72)$$

 $Ca^{2+}$  Uptake by the NSR

$$I_{up} = \frac{I_{up(max)}}{1 + (K_{up}/[Ca^{2+}]_i)} \quad (S73)$$

 $Ca^{2+}$  Leak Current by the NSR

$$I_{up,leak} = \frac{[Ca^{2+}]_{up}}{[Ca^{2+}]_{up(max)}} I_{up(max)} \quad (S74)$$

## Calcium Buffers

$$[Ca^{2+}]_{Cmndn} = [Cmndn]_{max} \frac{[Ca^{2+}]_i}{[Ca^{2+}]_i + K_{m,Cmndn}} \quad (S75)$$

$$[Ca^{2+}]_{Trpn} = [Trpn]_{max} \frac{[Ca^{2+}]_i}{[Ca^{2+}]_i + K_{m,Trpn}} \quad (S76)$$

$$[Ca^{2+}]_{Csqn} = [Csqn]_{max} \frac{[Ca^{2+}]_{rel}}{[Ca^{2+}]_{rel} + K_{m,Csqn}} \quad (S77)$$

## Numerical Integration

For the gating variables, at time  $t$ :

$$n^{(t+1)} = n_{\infty} - [n_{\infty} - n^{(t)}]e^{-\frac{\Delta t}{\tau}} \quad (S78)$$

For the rest of differential equations:

$$f^{(t+1)} = f^{(t)} + \Delta t \frac{\partial f}{\partial t} \quad (S79)$$

## 2 SUPPLEMENTARY TABLES

Table S1. Set of model parameters and universal constants

| Parameter             | Defintion                                                   | Value                      |
|-----------------------|-------------------------------------------------------------|----------------------------|
| R                     | Gas constant                                                | 8.3143 $JK^{-1}mol^{-1}$   |
| T                     | Temperature                                                 | 310K                       |
| F                     | Faraday constant                                            | 96.4867C/mmol              |
| $C_m$                 | Membrane capacitance                                        | 100pF                      |
| D                     | Diffusion Coefficient                                       | 0.00126cm <sup>2</sup> /ms |
| $v_{cell}$            | Cell volume                                                 | 20100μm <sup>3</sup>       |
| $v_i$                 | Intracellular volume                                        | 13668μm <sup>3</sup>       |
| $v_{up}$              | SR uptake compartment volume                                | 1109.52μm <sup>3</sup>     |
| $v_{rel}$             | SR release compartment volume                               | 96.48μm <sup>3</sup>       |
| $[K^+]_o$             | Extracellular $K^+$ concentration                           | 5.4mM                      |
| $[Na^+]_o$            | Extracellular $Na^+$ concentration                          | 140mM                      |
| $[Ca^{2+}]_o$         | Extracellular $Ca^{2+}$ concentration                       | 1.8mM                      |
| $[Cl^-]_o$            | Extracellular $Cl^-$ concentration                          | 132mM                      |
| $g_{Na}$              | Maximal $I_{Na}$ conductance                                | 13.9900nS/pF               |
| $g_{K1}$              | Maximal $I_{K1}$ conductance                                | 0.08218nS/pF               |
| $g_{to,2}/g_{Cl,Ca}$  | Maximal $I_{to}$ conductance                                | 0.15731nS/pF               |
| $g_{Kur,amp}$         | Maximal $I_{Kur}$ conductance                               | 0.45539nS/pF               |
| $g_{Kr}$              | Maximal $I_{Kr}$ conductance                                | 0.01730nS/pF               |
| $g_{Ks}$              | Maximal $I_{Ks}$ conductance                                | 0.0594nS/pF                |
| $g_{Ca,L}$            | Maximal $I_{Ca,L}$ conductance                              | 0.06574nS/pF               |
| $g_{b,Ca}$            | Maximal $I_{b,Ca}$ conductance                              | 0.00113nS/pF               |
| $g_{b,Na}$            | Maximal $I_{b,Na}$ conductance                              | 0.000674nS/pF              |
| $I_{NaK(max)}$        | Maximal $I_{NaK}$                                           | 0.94935pA/pF               |
| $I_{NaCa(max)}$       | Maximal $I_{NaCa}$                                          | 2304pA/pF                  |
| $I_{p,Ca(max)}$       | Maximal $I_{p,Ca}$                                          | 0.275pA/pF                 |
| $I_{up(max)}$         | Maximal $I_{up}$                                            | 0.005mM/ms                 |
| $K_{Q10}$             | Temperature scaling factor                                  | 3                          |
| $\gamma$              | Voltage dependence parameter for $I_{NaCa}$                 | 0.35                       |
| $K_{m,Na(i)}$         | $[Na^+]_i$ half-saturation constant for $I_{NaK}$           | 10mM                       |
| $K_{m,K(o)}$          | $[K^+]_o$ half-saturation constant for $I_{NaK}$            | 1.5mM                      |
| $K_{m,Na}$            | $[Na^+]_o$ half-saturation constant for $I_{NaCa}$          | 87.5mM                     |
| $K_{m,Ca}$            | $[Ca^{2+}]_o$ half-saturation constant for $I_{NaCa}$       | 1.38mM                     |
| $k_{sat}$             | Saturation factor for $I_{NaCa}$                            | 0.1                        |
| $k_{rel}$             | Maximal release rate for $I_{rel}$                          | 30ms <sup>-1</sup>         |
| $K_{up}$              | $[Ca^{2+}]_i$ half-saturation constant for $I_{up}$         | 0.00092mM                  |
| $[Ca^{2+}]_{up(max)}$ | Maximal $Ca^{2+}$ concentration in uptake compartment       | 15mM                       |
| $[Cmndn]_{max}$       | Total calmodulin concentration in myoplasm                  | 0.05mM                     |
| $[Trpn]_{max}$        | Total troponin concentration in myoplasm                    | 0.07mM                     |
| $[Csqn]_{max}$        | Total calsequestrin concentration in SR release compartment | 10mM                       |
| $K_{m,Cmndn}$         | $[Ca^{2+}]_i$ half-saturation constant for calmodulin       | 0.00238mM                  |
| $K_{m,Trpn}$          | $[Ca^{2+}]_i$ half-saturation constant for troponin         | 0.0005mM                   |
| $K_{m,Csqn}$          | $[Ca^{2+}]_i$ half-saturation constant for $I_{up}$         | 0.8mM                      |



**Table S2.** Set of initial values of variables used in the model.

| Variable          | Value                  |
|-------------------|------------------------|
| V                 | -76.0                  |
| $h_0$             | $9.65 \times 10^{-1}$  |
| $d_0$             | $1.37 \times 10^{-4}$  |
| $x_{r,0}$         | $3.29 \times 10^{-5}$  |
| $[Na^+]_i$        | $1.117 \times 10^{-1}$ |
| $[K^+]_i$         | $1.39 \times 10^2$     |
| $[Ca^{2+}]_{rel}$ | 1.488                  |
| $o_{i,0}$         | $9.99 \times 10^{-1}$  |
| $u_{if,0}$        | 1                      |
| $u_{is,0}$        | 1                      |
| $[Cmdn]_i$        | $2.05 \times 10^{-3}$  |
| $[Csqn]_i$        | 6.51                   |
| $[Trpn]_i$        | $1.18 \times 10^{-2}$  |
| $v_0$             | 1                      |
| $m_0$             | $2.91 \times 10^{-3}$  |
| $j_0$             | $9.78 \times 10^{-1}$  |
| $f_0$             | $9.99 \times 10^{-1}$  |
| $x_{s,0}$         | $1.87 \times 10^{-2}$  |
| $[Ca^{2+}]_i$     | 0.0001013              |
| $[Ca^{2+}]_{up}$  | 1.488                  |
| $[Cl^-]_i$        | 30                     |
| $o_{a,0}$         | $3.04 \times 10^{-2}$  |
| $u_{a,0}$         | $4.96 \times 10^{-3}$  |
| $fCa,0$           | $7.75 \times 10^{-1}$  |
| $u_0$             | $2.35 \times 10^{-2}$  |
| $w_0$             | $9.99 \times 10^{-1}$  |
| $I_{rel}$         | 0                      |
| $I_{b,k}$         | 0                      |
| $qCa,0$           | 0.0000001              |

### 3 SUPPLEMENTARY VIDEOS

#### **S1 Video.**

Pseudocolour plots of the membrane voltage distribution during the formation and spatiotemporal evolution of a spiral wave. The domain contains  $512 \times 512$  grid points and the video plays at 10fps. The total video represents 10s of simulation.

#### **S2 Video.**

Pseudocolour plots of the membrane voltage distribution during the breakup and spatiotemporal evolution of a spiral wave in altered parameter regime. Specifically, the maximum conductance for the  $I_{Kr}$  is reduced by a factor of 4. The domain contains  $1024 \times 1024$  grid points and the video plays at 10fps. The total video represents 10s of simulation.

### 4 SUPPLEMENTARY CODE

To access the python source code for the pig atrial cell model, please contact the corresponding author directly.
